# Supplementary material for: Curing Cats with Feline Infectious Peritonitis with an Oral Multi-Component Drug Containing GS-441524
Source: MDPI journal article supplement (doi:10.3390/v13112228), 2021-11-05
Supplement: s1 [file s1]

|     |                                         |
|-----|-----------------------------------------|
| 0%  | dead                                    |
| 10% | severely diseased                       |
| 20% | major changes in the general condition  |
| 30% | medium changes in the general condition |
| 40% | minor changes in the general condition  |
| 50% | completely normal general condition     |
