# Supplementary material for: Curing Cats with Feline Infectious Peritonitis with an Oral Multi-Component Drug Containing GS-441524
Source: MDPI journal article supplement (doi:10.3390/v13112228), 2021-11-05
Supplement: s1 [file s1]

|           | <b>Xraphconn®</b>  | <b>GS-441524</b>    |
|-----------|--------------------|---------------------|
| H-2'      | 4.63 (d)           | 4.94 (d)            |
| H-3'      | 3.95 (t)           | 4.35 (t)            |
| H-4'      | 4.05 (q)           | 4.42 (app q)        |
| H-5'/H-5" | 3.62(dd)/3.48 (dd) | 3.86 (dd)/3.79 (dd) |
| HO-2'     | 6.15               | nr                  |
| HO-3'     | 5.29               | nr                  |
| HO-5'     | 5.02               | nr                  |
| H-2       | 7.90 (s)           | 8.1(s)              |
| H-7       | 6.91(d)            | 7.37 (d)            |
| H-8       | 6.88(d)            | 7.14 (d)            |

|      | <b>Xraphconn®</b> | <b>GS-441524</b> |
|------|-------------------|------------------|
| C-1' | 78.7              | 78.6             |
| C-2' | 74.6              | 74.2             |
| C-3' | 70.4              | 70               |
| C-4' | 85.8              | 85.4             |
| C-5' | 61.3              | 60.9             |
| CN   | 117.8             | 117.3            |
| C-2  | 148.3             | 147.9            |
| C-5  | 116.8             | 116.5            |
| C-6  | 155.9             | 155.6            |
| C-7  | 101.4             | 100.8            |
| C-8  | 111.2             | 110.8            |
