# Supplementary material for: Curing Cats with Feline Infectious Peritonitis with an Oral Multi-Component Drug Containing GS-441524
Source: Viruses. 2021 Nov 5;13(11):2228. doi: 10.3390/v13112228 (PMC8621566; doi:10.3390/v13112228)
Supplement: Supplementary file 1 [file viruses-13-02228-s001.zip]

Archive with 7 entries (7 files):
- Figure S1.tif
- Figure S2.jpg
- File S1.pdf
- Table S1.pdf
- Table S2.pdf
- Table S3.pdf
- Text S1.pdf
